# Supplementary material for: Harmonization of indirect reference intervals calculation by the Bhattacharya method
Source: publisher site journal article supplement (doi:10.1515/cclm-2022-0439), 2022-11-17
Supplement: Supplementary file 2 [file j_cclm-2022-0439_suppl_002.docx]

**Supplemental Table 1.** Annual averages and number of results included (n) from the total extracted datasets in 2018 and 2019.

| Analytical test | 2018 | | 2019 | |
| --- | --- | --- | --- | --- |
| Average | n | Average | n |
| Sodium  (mmol/L) | 140.1 | 264449 | 139.5 | 280997 |
| Potassium  (mmol/L) | 4.38 | 264877 | 4.34 | 280691 |
| Chloride  (mmol/L) | 104 | 829 | 103 | 913 |
| Calcium (mmol/L) | 2.40  9.60a | 60421 | 2.39  9.59 a | 63780 |
| Magnesium  (mmol/L) | 0.82  2.0 a | 4783 | 0.86  2.1 a | 5062 |
| Phosphate (mmol/L) | 1.16  3.6 a | 46134 | 1.16  3.6 a | 48392 |
| Glucose  (mmol/L) | 5.78  96 a | 441351 | 5.77  96 a | 483216 |
| ALT  (U/L) | 20 | 426509 | 20 | 394085 |

aValues in mg/dL.

**Supplemental Table 2**. Summary of the graph variables of the Bhattacharya reference intervals method calculated by each user using the St Vincent’s hospital Spreadsheet (always r2>0.99).

| **Analytical test** | **Year** | **General characteristics** | | | | **User 1** | | | **User 2** | | | **User 3** | | | **User 4** | | |
| --- | --- | --- | --- | --- | --- | --- | --- | --- | --- | --- | --- | --- | --- | --- | --- | --- | --- |
| **n** | **Skew** | **Kurtosis** | **Central bin** | **Bin size** | **# points** | **# points inside** | **Bin size** | **# points** | **# points inside** | **Bin size** | **# points** | **# points inside** | **Bin size** | **# points** | **# points inside** |
| Sodium | 2018 | 264449 | -0.353 | 13.2 | 140.2 mmol/L | 0.70 | 10 | 4.5 | 0.50 | 12 | 2.5 | 0.70 | 8 | 4.5 | 0.80 | 10 | 5.5 |
| 2019 | 280997 | -0.627 | 4.9 | 139.5 mmol/L | 1.00 | 7 | 4.5 | 0.60 | 9 | 4.5 | 0.40 | 11 | 4.0 | 0.70 | 9 | 6.0 |
| Potassium | 2018 | 264877 | 1.646 | 68.6 | 4.36 mmol/L | 0.08 | 10 | 2.5 | 0.11 | 9 | 4.0 | 0.23 | 4 | 3.0 | 0.15 | 6 | 5.0 |
| 2019 | 280691 | 0.334 | 1.3 | 4.34 mmol/L | 0.08 | 12 | 0.0 | 0.14 | 7 | 3.0 | 0.15 | 6 | 4.5 | 0.15 | 7 | 4.5 |
| Chloride | 2018 | 829 | -0.054 | 12.0 | 103 mmol/L | 3.00 | 3 | 2.0 | 2.00 | 5 | 2.0 | 2.00 | 4 | 1.0 | 3.00 | 3 | 1.0 |
| 2019 | 913 | -0.884 | 3.1 | 103 mmol/L | 3.00 | 3 | 2.0 | 3.00 | 4 | 2.0 | 2.00 | 7 | 2.5 | 2.00 | 4 | 2.5 |
| Calcium | 2018 | 60421 | -0.159 | 12.6 | 2.4 mmol/L  (9.6 mg/dL) | 0.10 | 11 | 4.0 | 0.10 | 6 | 4.0 | 0.20 | 5 | 3.5 | 0.20 | 6 | 4.0 |
| 2019 | 63780 | -0.011 | 3.9 | 2.4 mmol/L  (9.6 mg/dL) | 0.10 | 10 | 2.5 | 0.20 | 6 | 3.5 | 0.20 | 8 | 2.5 | 0.20 | 8 | 3.5 |
| Magnesium | 2018 | 4783 | -1.172 | 5.6 | 0.86 mmol/L  (2.1 mg/dL) | 0.10 | 6 | 4.0 | 0.10 | 6 | 4.0 | 0.10 | 6 | 4.0 | 0.10 | 6 | 4.0 |
| 2019 | 5062 | -1.317 | 4.8 | 0.86 mmol/L  (2.1 mg/dL) | 0.10 | 5 | 4.0 | 0.10 | 6 | 4.0 | 0.10 | 8 | 5.0 | 0.10 | 6 | 4.0 |
| Phosphate  Males 18-50 years | 2018 | 3301 | 0.296 | 0.5 | 1.13 mmol/L  (3.5 mg/dL) | 0.30 | 7 | 4.0 | 0.40 | 5 | 2.5 | 0.30 | 7 | 3.0 | 0.40 | 5 | 2.5 |
| 2019 | 3398 | 0.503 | 1.4 | 1.13 mmol/L  (3.5 mg/dL) | 0.30 | 8 | 4.0 | 0.40 | 5 | 3.0 | 0.30 | 10 | 4.0 | 0.30 | 9 | 4.0 |
| Phosphate  Females 18-50 years | 2018 | 6279 | 0.209 | 0.3 | 1.19 mmol/L  (3.7 mg/dL) | 0.30 | 6 | 3.5 | 0.30 | 6 | 3.0 | 0.20 | 6 | 5.5 | 0.20 | 6 | 6.0 |
| 2019 | 6693 | 0.252 | 0.5 | 3.6 mg/dL  (1.16 mmol/L) | 0.30 | 5 | 4.0 | 0.40 | 5 | 3.0 | 0.20 | 4 | 4.0 | 0.30 | 5 | 4.0 |
| Phosphate  Males 51-65 years | 2018 | 3074 | 0.742 | 4.9 | 1.07 mmol/L  (3.3 mg/dL) | 0.30 | 6 | 3.5 | 0.30 | 6 | 3.5 | 0.30 | 6 | 3.0 | 0.30 | 6 | 3.5 |
| 2019 | 3047 | 0.397 | 0.6 | 1.07 mmol/L  (3.3 mg/dL) | 0.30 | 6 | 3.0 | 0.50 | 4 | 2.5 | 0.20 | 5 | 3.5 | 0.40 | 5 | 3.0 |
| Phosphate  Females 51-65 years | 2018 | 8406 | 0.17 | 0.6 | 1.19 mmol/L  (3.7 mg/dL) | 0.20 | 9 | 4.5 | 0.20 | 9 | 4.5 | 0.30 | 6 | 3.0 | 0.30 | 7 | 4.0 |
| 2019 | 8680 | 0.156 | 0.6 | 1.19 mmol/L  (3.7 mg/dL) | 0.20 | 7 | 5.0 | 0.30 | 7 | 3.0 | 0.20 | 7 | 5.0 | 0.30 | 8 | 4.0 |
| Phosphate  Males >65 years | 2018 | 6641 | 0.862 | 5.0 | 1.03 mmol/L  (3.2 mg/dL) | 0.20 | 7 | 4.5 | 0.30 | 7 | 3.0 | 0.20 | 4 | 4.0 | 0.20 | 6 | 4.0 |
| 2019 | 6635 | 0.63 | 1.9 | 1.03 mmol/L  (3.2 mg/dL) | 0.30 | 6 | 3.5 | 0.40 | 5 | 2.5 | 0.20 | 5 | 4.0 | 0.30 | 7 | 3.5 |
| Phosphate  Females >65 years | 2018 | 18433 | 0.315 | 1.9 | 1.13 mmol/L  (3.5 mg/dL) | 0.20 | 8 | 5.5 | 0.20 | 7 | 5.0 | 0.20 | 5 | 4.0 | 0.20 | 8 | 5.5 |
| 2019 | 19939 | 0.399 | 2.3 | 1.13 mmol/L  (3.5 mg/dL) | 0.20 | 6 | 4.0 | 0.30 | 5 | 3.0 | 0.20 | 7 | 5.0 | 0.30 | 6 | 3.5 |
| Glucose | 2018 | 441351 | 1.554 | 3.8 | 0.728 a  (1.984b) | 0.030 | 7 | 2.5 | 0.030 | 6 | 2.5 | 0.021 | 4 | 1.5 | 0.041 | 4 | 2.5 |
| 2019 | 483216 | 1.590 | 3.9 | 0.728 a  (1.983b) | 0.026 | 6 | 3.5 | 0.031 | 4 | 3.0 | 0.028 | 4 | 2.0 | 0.035 | 4 | 2.5 |
| ALT Males 18-50 years | 2018 | 56074 | 0.863 | 2.1 | 1.426c | 0.086 | 4 | 2.5 | 0.074 | 4 | 3.5 | 0.072 | 4 | 4.0 | 0.190 | 5 | 2.5 |
| 2019 | 51543 | 0.772 | 1.5 | 1.424c | 0.108 | 4 | 3.0 | 0.074 | 4 | 3.5 | 0.074 | 4 | 2.5 | 0.190 | 4 | 2.5 |
| ALT Females 18-50 years | 2018 | 85341 | 1.329 | 4.0 | 1.217c | 0.130 | 5 | 2.5 | 0.086 | 4 | 3.0 | 0.091 | 4 | 3.0 | 0.130 | 4 | 2.5 |
| 2019 | 83137 | 1.245 | 3.7 | 1.217c | 0.085 | 4 | 3.0 | 0.085 | 4 | 3.0 | 0.126 | 4 | 2.0 | 0.130 | 4 | 2.5 |
| ALT Males 51-65 years | 2018 | 44790 | 0.705 | 2.0 | 1.403c | 0.089 | 4 | 2.0 | 0.089 | 5 | 3.0 | 0.059 | 4 | 4.0 | 0.091 | 5 | 3.0 |
| 2019 | 40742 | 0.606 | 1.5 | 1.412c | 0.070 | 4 | 3.0 | 0.072 | 4 | 3.0 | 0.064 | 4 | 4.0 | 0.124 | 4 | 2.5 |
| ALT Females 51-65 years | 2018 | 57850 | 1.002 | 2.9 | 1.309c | 0.089 | 4 | 3.0 | 0.089 | 4 | 3.0 | 0.049 | 4 | 3 | 0.089 | 4 | 3.0 |
| 2019 | 55445 | 0.993 | 2.7 | 1.312c | 0.086 | 4 | 3.0 | 0.089 | 4 | 3.0 | 0.086 | 4 | 3 | 0.089 | 4 | 3.0 |
| ALT Males 66-80 years | 2018 | 46296 | 0.695 | 3.0 | 1.310c | 0.088 | 4 | 2.5 | 0.092 | 5 | 3.0 | 0.079 | 4 | 4.0 | 0.124 | 5 | 3.0 |
| 2019 | 42523 | 0.551 | 2.0 | 1.318c | 0.088 | 4 | 2.0 | 0.095 | 4 | 3.0 | 0.073 | 4 | 4 | 0.090 | 4 | 2.5 |
| ALT Females 66-80 years | 2018 | 64799 | 1.105 | 4.8 | 1.245c | 0.086 | 5 | 3.5 | 0.102 | 4 | 2.0 | 0.085 | 4 | 3.5 | 0.117 | 5 | 2.0 |
| 2019 | 61040 | 0.969 | 4.0 | 1.255c | 0.080 | 4 | 2.5 | 0.080 | 4 | 3.0 | 0.08 | 4 | 2.5 | 0.120 | 5 | 2.0 |
| ALT Males >80 years | 2018 | 20790 | 0.733 | 3.1 | 1.189c | 0.118 | 4 | 2.0 | 0.081 | 4 | 3.0 | 0.130 | 4 | 2.0 | 0.130 | 4 | 2.5 |
| 2019 | 19953 | 0.611 | 2.6 | 1.199c | 0.091 | 4 | 3.0 | 0.087 | 5 | 2.5 | 0.078 | 4 | 3.5 | 0.130 | 4 | 1.5 |
| ALT Females >80 years | 2018 | 42569 | 0.930 | 4.3 | 1.138c | 0.097 | 4 | 2.0 | 0.098 | 4 | 2.5 | 0.097 | 4 | 2.5 | 0.130 | 5 | 2.5 |
| 2019 | 39702 | 0.869 | 3.8 | 1.153c | 0.126 | 4 | 2.0 | 0.068 | 4 | 3.0 | 0.034 | 5 | 2.5 | 0.130 | 4 | 2.0 |

a Log(10) of average in mmol/L. b Log(10) of average in mg/dL. c Log(10) of average in U/L

**Supplemental Table 3.** Reference interval results obtained by four independent laboratory specialists using the Bhattacharya method and currently used reference intervals in Vall d’Hebron laboratory (RIcu). Shaded results were excluded from the final calculation of reference intervals and 95%CI.

| **Analytical test** | **RIcu** | | **Year** | **Bhattacharya (95%CI)** | **User 1** | **User 2** | **User 3** | **User 4** |
| --- | --- | --- | --- | --- | --- | --- | --- | --- |
| Sodium (mmol/L) | LRL | 136 | 2018 | 136.4 (136.3-136.5) | 136.3 | 136.5 | 136.5 | 136.3 |
| 2019 | 135.9 (135.8-136.0) | 135.8 | 136.0 | 136.0 | 135.8 |
| URL | 146 | 2018 | 144.2 (144.1-144.3) | 144.3 | 144.1 | 144.1 | 144.3 |
| 2019 | 143.3 (143.2-143.4) | 143.4 | 143.2 | 143.2 | 143.4 |
| Potassium (mmol/L) | LRL | 3.50 | 2018 | 3.63 (3.63-3.63) | 3.63 | 3.63 | 3.55 | 3.63 |
| 2019 | 3.62 (3.61-3.62) | 3.62 | 3.61 | 3.62 | 3.62 |
| URL | 5.10 | 2018 | 5.02 (4.99-5.04) | 4.99 | 5.03 | 5.11 | 5.03 |
| 2019 | 5.02 (5.01-5.02) | 4.98 | 5.01 | 5.02 | 5.02 |
| Chloride (mmol/L) | LRL | 101 | 2018 | 97 (97-97) | 97 | 97 | 97 | 97 |
| 2019 | 97 (97-97) | 97 | 97 | 97 | 97 |
| URL | 109 | 2018 | 109 (109-109) | 109 | 109 | 109 | 109 |
| 2019 | 109 (109-109) | 109 | 109 | 109 | 109 |
| Calcium (mmol/L) | LRL | 2.20  8.8a | 2018 | 2.20 (2.20-2.20)  8.8 (8.8-8.8) a | 2.20  8.8 a | 2.20  8.8 a | 2.20  8.8 a | 2.20  8.8 a |
| 2019 | 2.20 (2.20-2.20)  8.8 (8.8-8.8) a | 2.20  8.8 a | 2.20  8.8 a | 2.20  8.8 a | 2.20  8.8 a |
| URL | 2.65  10.6 a | 2018 | 2.60 (2.60-2.60)  10.4 (10.4-10.4) a | 2.60  10.4 a | 2.60  10.4 a | 2.60  10.4 a | 2.60  10.4 a |
| 2019 | 2.60 (2.60-2.60)  10.4 (10.4-10.4) a | 2.60  10.4 a | 2.60  10.4 a | 2.60  10.4 a | 2.60  10.4 a |
| Magnesium (mmol/L) | LRL | 0.74 M/  1.8 a  0.78 F  1.9 a | 2018 | 0.74 (0.74-0.74)  1.8 (1.8-1.8) a | 0.74  1.8 a | 0.74  1.8 a | 0.74  1.8 a | 0.74  1.8 a |
| 2019 | 0.74 (0.74-0.74)  1.8 (1.8-1.8) a | 0.74  1.8 a | 0.74  1.8 a | 0.74  1.8 a | 0.74  1.8 a |
| URL | 1.07 M/  2.6 a  1.03 F  2.5 a | 2018 | 0.99 (0.99-0.99)  2.4 (2.4-2.4) a | 0.99  2.4 a | 0.99  2.4 a | 0.99  2.4 a | 0.99  2.4 a |
| 2019 | 0.99 (0.99-0.99)  2.4 (2.4-2.4) a | 0.99  2.4 a | 0.99  2.4 a | 0.99  2.4 a | 0.99  2.4 a |
| Phosphate (mmol/L)  (Males 18-50 years) | LRL | 0.81  2.5 a | 2018 | 0.77 (0.74-0.81)  2.4 (2.3-2.5) a | 0.74  2.3 a | 0.81  2.5 a | 0.74  2.3 a | 0.81  2.5 a |
| 2019 | 0.74 (0.74-0.77)  2.3 (2.3-2.4) a | 0.74  2.3 a | 0.74  2.3 a | 0.77  2.4 a | 0.74  2.3 a |
| URL | 1.45  4.5 a | 2018 | 1.48 (1.45-1.51)  4.6 (4.5-4.7) a | 1.51  4.7 a | 1.45  4.5 a | 1.51  4.7 a | 1.45  4.5 a |
| 2019 | 1.51 (1.51-1.54)  4.7 (4.7-4.8) a | 1.51  4.7 a | 1.51  4.7 a | 1.54  4.8 a | 1.51  4.7 a |
| Phosphate (mmol/L)  (Females 18-50 years) | LRL | 0.81  2.5 a | 2018 | 0.87 (0.84-0.87)  2.7 (2.6-2.7) a | 0.87  2.7 a | 0.87  2.7 a | 0.84  2.6 a | 0.84  2.6 a |
| 2019 | 0.81 (0.77-0.84)  2.5 (2.4-2.6) a | 0.77  2.4 a | 0.84  2.6 a | 0.84  2.6 a | 0.77  2.4 a |
| URL | 1.45  4.5 a | 2018 | 1.51 (1.48-1.51)  4.7 (4.6-4.7) a | 1.51  4.7 a | 1.51  4.7 a | 1.48  4.6 a | 1.48  4.6 a |
| 2019 | 1.51 (1.48-1.54)  4.7 (4.6-4.8) a | 1.54  4.8 a | 1.48  4.6 a | 1.48  4.6 a | 1.54  4.8 a |
| Phosphate (mmol/L)  (Males 51-65 years) | LRL | 0.81  2.5 a | 2018 | 0.71 (0.71-0.71)  2.2 (2.2-2.2) a | 0.71  2.2 a | 0.71  2.2 a | 0.71  2.2 a | 0.71  2.2 a |
| 2019 | 0.71 (0.71-0.71)  2.2 (2.2-2.2) a | 0.71  2.2 a | 0.71  2.2 a | 0.71  2.2 a | 0.71  2.2 a |
| URL | 1.45  4.5 a | 2018 | 1.35 (1.35-1.35)  4.2 (4.2-4.2) a | 1.35  4.2 a | 1.35  4.2 a | 1.35  4.2 a | 1.35  4.2 a |
| 2019 | 1.35 (1.35-1.35)  4.2 (4.2-4.2) a | 1.35  4.2 a | 1.35  4.2 a | 1.35  4.2 a | 1.35  4.2 a |
| Phosphate (mmol/L)  (Females 51-65 years) | LRL | 0.81  2.5 a | 2018 | 0.87 (0.87-0.87)  2.7 (2.7-2.7) a | 0.87  2.7 a | 0.87  2.7 a | 0.87  2.7 a | 0.87  2.7 a |
| 2019 | 0.87 (0.87-0.87)  2.7 (2.7-2.7) a | 0.87  2.7 a | 0.87  2.7 a | 0.87  2.7 a | 0.87  2.7 a |
| URL | 1.45  4.5 a | 2018 | 1.51 (1.51-1.51)  4.7 (4.7-4.7) a | 1.51  4.7 a | 1.51  4.7 a | 1.51  4.7 a | 1.51  4.7 a |
| 2019 | 1.51 (1.51-1.51)  4.7 (4.7-4.7) a | 1.51  4.7 a | 1.51  4.7 a | 1.51  4.7 a | 1.51  4.7 a |
| Phosphate (mmol/L)  (Males >65 years) | LRL | 0.81  2.5 a | 2018 | 0.74 (0.71-0.77)  2.3 (2.2-2.4) a | 0.77  2.4a | 0.71  2.2 a | 0.77  2.4 a | 0.71  2.2 a |
| 2019 | 0.71 (0.68-0.71)  2.2 (2.1-2.2) a | 0.71  2.2 a | 0.71  2.2 a | 0.68  2.1 a | 0.71  2.2 a |
| URL | 1.45  4.5 a | 2018 | 1.32 (1.29-1.35)  4.1 (4.0-4.2) a | 1.29  4.0a | 1.35  4.2 a | 1.29  4.0 a | 1.35  4.2 a |
| 2019 | 1.35 (1.32-1.35)  4.2 (4.1-4.2) a | 1.35  4.2a | 1.35  4.2 a | 1.32  4.1 a | 1.35  4.2 a |
| Phosphate (mmol/L)  (Females >65 years) | LRL | 0.81  2.5 a | 2018 | 0.81 (0.81-0.81)  2.5 (2.5-2.5) a | 0.81  2.5a | 0.81  2.5 a | 0.87  2.7 a | 0.81  2.5 a |
| 2019 | 0.87 (0.87-0.87)  2.7 (2.7-2.7) a | 0.87  2.7 a | 0.87  2.7 a | 0.87  2.7 a | 0.81  2.5 a |
| URL | 1.45  4.5 a | 2018 | 1.45 (1.45-1.45)  4.5 (4.5-4.5) a | 1.45  4.5 a | 1.45  4.5 a | 1.39  4.3 a | 1.45  4.5 a |
| 2019 | 1.39 (1.39-1.39)  4.3 (4.3-4.3) a | 1.39  4.3 a | 1.39  4.3 a | 1.39  4.3 a | 1.45  4.5 a |
| Glucose (mmol/L) | LRL | 4.1  74 a | 2018 | 4.08 (3.72-4.14)  68 (67-69) a | 4.08  68 a | 4.08  68 a | 3.72  67 a | 4.14  69 a |
| 2019 | 4.08 (3.72-4.14)  68 (67-69) a | 4.02  67 a | 4.08  68 a | 4.08  68 a | 4.14  69 a |
| URL | 5.9  106 a | 2018 | 6.66 (6.60-6.72)  111 (110-112) a | 6.72  112 a | 6.72  112 a | 6.60  110 a | 6.66  111 a |
| 2019 | 6.66 (6.60-6.66)  111 (110-111) a | 6.66  111 a | 6.60  110 a | 6.66  111 a | 6.60  110 a |
| ALT (IU/L)  (Males 18-50 years) | LRL | 10 | 2018 | 11 (11-12) | 11 | 11 | 12 | 11 |
| 2019 | 10 (10-10) | 12 | 10 | 10 | 10 |
| URL | 50 | 2018 | 59 (54-64) | 48 | 61 | 54 | 62 |
| 2019 | 62 (60-63) | 53 | 61 | 61 | 63 |
| ALT (IU/L)  (Females 18-50 years) | LRL | 10 | 2018 | 7 (7-8) | 7 | 8 | 5 | 7 |
| 2019 | 8 (7-8) | 8 | 8 | 8 | 7 |
| URL | 35 | 2018 | 31 (30-31) | 31 | 28 | 31 | 30 |
| 2019 | 29 (27-31) | 27 | 27 | 30 | 30 |
| ALT (IU/L)  (Males 51-65 years) | LRL | 10 | 2018 | 12 (11-12) | 12 | 12 | 9 | 12 |
| 2019 | 13 (13-14) | 13 | 13 | 14 | 11 |
| URL | 50 | 2018 | 45 (43-47) | 43 | 46 | 44 | 47 |
| 2019 | 49 (45-53) | 45 | 46 | 53 | 52 |
| ALT (IU/L)  (Females 51-65 years) | LRL | 10 | 2018 | 10 (10-10) | 10 | 10 | 7 | 10 |
| 2019 | 11 (10-11) | 11 | 10 | 11 | 10 |
| URL | 35 | 2018 | 34 (33-34) | 34 | 34 | 33 | 34 |
| 2019 | 34 (34-34) | 34 | 34 | 34 | 34 |
| ALT (IU/L)  (Males 66-80 years) | LRL | 10 | 2018 | 9 (8-10) | 10 | 9 | 8 | 9 |
| 2019 | 11 (10-12) | 11 | 10 | 12 | 11 |
| URL | 50 | 2018 | 40 (36-44) | 35 | 42 | 44 | 40 |
| 2019 | 39 (37-41) | 37 | 42 | 38 | 38 |
| ALT (IU/L)  (Females 66-80 years) | LRL | 10 | 2018 | 9 (8-10) | 8 | 10 | 8 | 9 |
| 2019 | 10 (9-10) | 10 | 10 | 10 | 9 |
| URL | 35 | 2018 | 31 (31-31) | 31 | 29 | 31 | 31 |
| 2019 | 31 (31-31) | 31 | 31 | 31 | 33 |
| ALT (IU/L)  (Males >80 years) | LRL | 10 | 2018 | 8 (7-9) | 8 | 9 | 7 | 7 |
| 2019 | 8 (7-9) | 9 | 8 | 9 | 7 |
| URL | 50 | 2018 | 32 (31-34) | 29 | 31 | 33 | 33 |
| 2019 | 30 (29-32) | 30 | 29 | 32 | 37 |
| ALT (IU/L)  (Females >80 years) | LRL | 10 | 2018 | 8 (7-8) | 8 | 7 | 8 | 7 |
| 2019 | 7 (7-7) | 7 | 7 | 7 | 7 |
| URL | 35 | 2018 | 23 (23-24) | 23 | 24 | 23 | 29 |
| 2019 | 24 (22-25) | 25 | 23 | 22 | 25 |

a Values in mg/dL. M: male; F: Female; LRL: Lower Reference Limit; URL: Upper Reference Limit
